# Supplementary material for: Amaranth as a natural food colorant source: Survey of germplasm and optimization of extraction methods for betalain pigments
Source: Front Plant Sci. 2022 Sep 21;13:932440. doi: 10.3389/fpls.2022.932440 (PMC9532763; doi:10.3389/fpls.2022.932440)
Supplement: Supplementary file 5 [file Table_1.XLSX]

## Sheet: AllDataSummary
Supplementary Table S1. Raw data of betacyanin yields, composition, spectral properties, and plant biomass for all forty-eight amaranth accessions and genotypes surveyed. Accessions are ranked based on total betacyanin yields determined from four or three greenhouse trials. Each trial consisted of five plants per accession. Rankings also correspond to numbered ranks used in Table 1 and Figure 1 i…
							CIELAB Color Parameters						% Betacyanin Composition				Biomass measurements
Species	Accession or Cultivar	Source	Rank in Table 1	Greenhouse Replicate	Total Betacyanin Yield (mg/100 g DT)	Flav ABS	L*	A*	B*	C*	H*	LAMBDA	amaranthin	isoamaranthin	betanin	isobetanin	Average Leaf Length (mm)	Average Stem Diameter (mm)	Average Plant Height (cm)	Average Leaf Width (mm)	Sum of Fresh Aboveground Mass (g/all plants in trial)	AvgMass (g/plant)	Lyophilized Dry Mass (g)	% Water
A. cruentus	PI 566897	USDA-ARS	1	1	517.61	0.065	65.1669	61.811	-25.3184	66.7954	-22.2745	536.2	0.923133	0.0526047	0.018532	0	125.062	6.09	24.2	64.854	84.97	16.994	14.1	0.834059
A. cruentus				2	411.11	0.072	66.0322	62.8593	-24.7158	67.5438	-21.4644	537.55	0.837382	0.124695	0.0160156	0.0020146	79.69	5.2	15.4	38.84	31.47	6.294	6.4	0.796632
A. cruentus				3	464.816	0.074	65.5067	62.206	-25.906	67.3848	-22.6095	535.7	0.815366	0.143336	0.0133172	0	74.648	4.48	15.6	35.416	27.7	5.54	5.8	0.790614
A. cruentus				4	521.7	0.084	65.266	62.005	-23.834	66.428	-21.0262	535.6	0.915782	0.0703039	0.0139143	0	125.277	na	25	56.0367	60.2	20.0667	9.4	0.843854
A. cruentus	Hopi Red Dye	Seeds of Change	2	1	655.635	0.072	64.7386	59.1928	-20.0391	62.4928	-18.703	535.8	0.936216	0.0523324	0.0053017	0.00238351	125.018	6.954	29.6	65.212	98.89	19.778	15.6	0.842249
A. cruentus				2	258.193	0.061	64.6625	59.9375	-20.3734	63.3054	-18.7735	536	0.862138	0.121777	0.00575407	0	74.752	4.938	26.2	35.368	35.5	7.1	6.6	0.814085
A. cruentus				3	247.697	0.097	64.423	58.6727	-18.6065	61.5524	-17.595	537.5	0.801734	0.187981	0.00334111	0	74.304	4.622	18	36.588	33	6.6	6.8	0.793939
A. cruentus				4	379.988	0.051	65.0373	60.9274	-22.5745	64.975	-20.3304	535.8	0.925265	0.0690136	0	0	122.947	na	38.6667	59.3233	62.4	20.8	9.3	0.850962
A. cruentus	PI 674259	USDA-ARS	3	1	351.919	0.045	64.8198	60.5133	-21.4258	64.1945	-19.4974	535.85	0.944955	0.0402113	0.00735796	0.00305941	132.896	6.602	25.6	65.614	88.44	17.688	16.5	0.813433
A. cruentus				2	387.026	0.049	65.931	62.4917	-23.2373	66.6722	-20.3974	537.5	0.889767	0.0928116	0.00838846	0	106.082	5.66	22	43.732	48.2	9.64	9.9	0.794606
A. cruentus				3	432.283	0.064	65.6677	62.2865	-25.8482	67.4369	-22.5379	537	0.863163	0.125533	0.00382825	0	106.986	5.612	19.4	45.308	47.3	9.46	9.5	0.799154
A. cruentus				4	328.409	0.061	65.1029	60.5771	-21.352	64.23	-19.4164	537	0.958458	0.0415418	0	0	147.767	na	42.6667	70.73	104.5	34.8333	11.6	0.888995
A. cruentus	Hopi Red MU 560	West Coast Seeds	4	1	456.651	0.067	65.1545	61.9015	-25.5136	66.9533	-22.3997	536	0.935799	0.0534882	0.00538855	0.00200018	119.928	6.574	32.2	62.888	94.05	18.81	12.5	0.867092
A. cruentus				2	218.02	0.061	64.5535	59.6973	-20.5298	63.1288	-18.978	535.7	0.835383	0.148365	0.0039802	0	75.936	4.91	27.2	35.232	38.2	7.64	7.5	0.803665
A. cruentus				3	240.12	0.065	64.6095	60.1138	-21.0908	63.7063	-19.3333	537.5	0.811116	0.179038	0.0024349	0	70.518	4.458	18.8	31.478	21.4	4.28	4.5	0.78972
A. cruentus				4	405.035	0.041	64.8052	60.3246	-21.9567	64.1962	-20.0003	538	0.938023	0.0604394	0.00153803	0	132.86	na	41	66.44	90.1	30.0333	12.3	0.863485
A. cruentus	Polish	USDA-ARS	5	1	302.311	0.069	64.7291	59.3084	-20.3159	62.6915	-18.9088	536	0.916696	0.0632685	0.00953346	0.00104346	134.012	6.722	25.2	61.56	92.13	18.426	14.2	0.84587
A. cruentus				2	306.951	0.05	65.8239	62.1004	-22.5213	66.0581	-19.9337	536.8	0.885846	0.101644	0.0125101	0	71.524	4.664	20.4	31.946	21.9	4.38	4.2	0.808219
A. cruentus				3	354.519	0.068	65.2814	61.374	-24.1911	65.9695	-21.5123	535.8	0.848037	0.13475	0.00480949	0	92.35	5.32	17.4	36.796	31.1	6.22	7	0.77492
A. cruentus				4	351.691	0.042	64.6439	59.4815	-19.9889	62.7503	-18.575	535.8	0.934296	0.0540671	0	0	143.883	na	35.3333	62.64	80.3	26.7667	14.2	0.823163
A. cruentus	Ames 5384	USDA-ARS	6	1	335.505	0.058	64.6188	59.9327	-20.9445	63.4871	-19.2628	535.7	0.944259	0.0441495	0.00801764	0.00357402	132.044	6.642	29.4	59.768	93.49	18.698	17.9	0.808536
A. cruentus				2	367.72	0.051	64.9198	60.2924	-21.8979	64.1459	-19.9608	537.5	0.856636	0.110442	0.00752586	0	86.572	4.61	19.2	33.664	28	5.6	6.4	0.771429
A. cruentus				3	321.354	0.061	65.1865	61.0402	-23.1719	65.2905	-20.7876	536.45	0.832474	0.142381	0	0	79.132	4.592	14.8	33.276	33.5	6.7	6.8	0.797015
A. cruentus				4	264.259	na	66.02	65.0304	-22.4334	68.7911	-19.0328	536.45	0.956149	0.0438508	0	0	150.907	na	42.6667	61.87	117.7	39.2333	15.8	0.86576
A. cruentus	Hopi Red Dye	Baker Creek Seeds	7	1	339.35	0.031	64.9353	60.2181	-19.7772	63.3826	-18.1816	535	0.855285	0.136521	0.00558051	0.00261336	93.102	5.948	28.8	47.054	61.5	11.2	12.6	0.795122
A. cruentus				2	212.369	0.062	65.0472	59.6278	-17.8294	62.2364	-16.6473	535.7	0.777555	0.207099	0.00813658	0	101.346	6.45	33.2	52.234	74.8	14.96	15.6	0.791444
A. cruentus				3	214.657	0.075	64.6417	59.1333	-19.3498	62.2186	-18.1193	535.9	0.926989	0.0730111	0	0	93.102	5.948	28.8	47.054	61.5	12.3	12.6	0.795122
A. cruentus				4	365.63	0.039	64.8659	60.2391	-21.3838	63.9219	-19.5439	535.9	0.941922	0.058078	0	0	140.067	na	46.6667	71.4267	107.5	35.8333	15.6	0.854884
A. sp	PI 689689	USDA-ARS	8	1	350.819	0.101	66.2044	63.3906	-27.9372	69.2737	-23.7838	535.5	0.931972	0.0497698	0.0160032	0.00225496	107.056	6.656	23.8	52.006	85.55	17.11	11.58	0.864641
A. sp				2	219.661	0.203	65.5009	61.4702	-24.9694	66.348	-22.1072	536	0.883271	0.0996281	0.0171007	0	49.564	3.954	16.2	23.21	15.2	3.04	3	0.802632
A. sp				3	209.944	0.129	65.5233	61.587	-24.7852	66.3872	-21.9219	536	0.8704	0.120892	0.00732241	0	51.844	4.102	15.2	23.996	17.2	3.44	3.2	0.813953
A. sp				4	303.163	0.207	65.6993	62.9221	-27.4428	68.6462	-23.5639	536	0.932891	0.0649745	0.0021347	0	105.817	na	38.6667	52.2033	85.4	28.4667	13.3	0.844262
A. cruentus	PI 665286	USDA-ARS	9	1	286.232	0.085	64.7647	59.4241	-19.8583	62.6545	-18.4786	537	0.94441	0.0423127	0.00775953	0	132.396	6.724	28.6	69.896	109.44	21.888	13.3	0.878472
A. cruentus				2	245.595	0.141	64.9499	59.8348	-20.898	63.3793	-19.2524	536.95	0.884666	0.0969505	0.00700194	0	76.034	4.676	21	34.986	29.7	5.94	6.1	0.794613
A. cruentus				3	190.017	0.093	65.2879	60.962	-23.0317	65.1677	-20.6968	535.9	0.910529	0.0883237	0.00114719	0	72.13	3.9525	15.25	31.4125	18.8	4.7	3.6	0.808511
A. cruentus				4	346.032	0.114	65.3724	61.0814	-23.3467	65.3912	-20.918	535.9	0.952444	0.0475558	0	0	125.827	na	37.6667	56.56	64.7	21.5667	11.3	0.825348
A. cruentus	PI 511713	USDA-ARS	10	1	285.643	0.074	64.6673	59.1089	-16.4317	61.3503	-15.5354	536	0.94009	0.0446537	0.00659613	0	121.956	6.71	25	63.496	82.01	16.402	12.3	0.850018
A. cruentus				2	185.982	0.111	65.1682	59.0002	-13.5966	60.5466	-12.9772	535.9	0.880795	0.0837917	0.0220092	0	71.972	4.734	21.4	34.35	54	7.32	9.5	0.824074
A. cruentus				3	188.076	0.153	64.3524	58.2402	-16.6514	60.5738	-15.9557	535.7	0.85696	0.126548	0.00399795	0	111.636	6.724	25.8	49.258	77.2	15.44	17.1	0.778497
A. cruentus				4	277.212	0.077	64.7763	59.3946	-17.9861	62.0582	-16.8476	535.7	0.957429	0.0425712	0	0	124.55	na	34.3333	50.07	54	18	9.5	0.824074
A. cruentus	PI 511714	USDA-ARS	11	1	266.4	0.082	64.6922	59.2036	-16.1048	61.355	-15.2176	536	0.938329	0.0466785	0.00515369	0.00140824	131.408	6.466	30.6	61.314	95.89	19.178	14.2	0.851914
A. cruentus				2	169.87	0.119	64.6721	57.7108	-11.9302	58.9311	-11.6799	535.7	0.888866	0.0798916	0.00662397	0	71.346	4.64	18.4	34.06	29.91	5.982	6	0.799398
A. cruentus				3	204.405	0.137	64.4782	59.0715	-18.7825	61.9857	-17.6387	535.7	0.886604	0.113396	0	0	106.07	5.756	25	48.776	53.3	10.66	11.7	0.780488
A. cruentus				4	286.07	0.134	65.1066	59.9159	-17.9701	62.5527	-16.6952	535.7	0.954972	0.0450281	0	0	117.44	na	34.7833	41.4867	56.5	18.8333	9.5	0.831858
A. sp	Four Star Explorers Mix	Wild Garden Seed	12	1	341.376	0.086	64.6717	59.5798	-21.2064	63.2413	-19.5923	537	0.909288	0.0811642	0.00644772	0.00254319	113.28	6.192	28.6	54.486	67.72	13.544	8.8	0.870053
A. sp				2	140.307	0.085	64.4827	57.7674	-14.1134	59.4664	-13.7292	535.95	0.842419	0.119203	0.0132901	0	69.276	4.938	23.8	33.2	24.7	4.94	6.4	0.740891
A. sp				3	172.403	0.083	64.6567	59.1745	-19.6292	62.3452	-18.3515	535.9	0.815243	0.157146	0.00861469	0	68.402	4.164	18.4	31.228	24.5	4.9	5.3	0.783673
A. sp				4	147.489	0.052	65.1301	61.1437	-22.6184	65.1932	-20.3006	535.9	0.913326	0.0631195	0	0	128.16	na	38.25	53.625	49.3	24.65	8.3	0.831643
A. cruentus	Velvet Curtains	Sunshine Flower Seeds	13	1	325.044	0.048	64.992	60.6398	-21.7315	64.4162	-19.7161	535.9	0.896614	0.0805318	0.0107092	0	120.698	7.148	29.6	64.258	105.35	21.07	15.68	0.851163
A. cruentus				2	105.702	0.091	64.0608	56.588	-13.6967	58.222	-13.6064	535.55	0.83316	0.136931	0.00130195	0	84.536	5.302	29.2	38.36	51.2	11.4	9.6	0.8125
A. cruentus				3	120.775	0.095	64.7221	58.9705	-18.7208	61.8707	-17.6126	535.9	0.860343	0.126239	0.000996197	0	49.66	3.0275	16	20.7625	11	2.75	2.1	0.809091
A. cruentus				4	240.407	0.028	64.7258	60.0877	-21.4399	63.7981	-19.6369	535.9	0.939755	0.046407	0.00767682	0	141.96	na	38.5	64.135	65.6	32.8	9.6	0.853659
A. cruentus	PI 633592	USDA-ARS	14	1	283.06	0.075	64.2918	57.9273	-17.4583	60.5009	-16.7719	536	0.920061	0.0680828	0.009521	0.00233508	133.074	6.15	22.2	53.356	95.49	19.098	13.5	0.858624
A. cruentus				2	115.476	0.065	64.4623	56.6428	-9.79103	57.4828	-9.80699	535.9	0.784716	0.191778	0.0204753	0	80.024	5.414	17.2	35.926	37.2	7.44	8.2	0.77957
A. cruentus				3	137.203	0.094	64.3214	57.9494	-15.6245	60.0188	-15.0894	535.7	0.804096	0.17847	0.00475459	0	97.296	5.372	22.4	41.86	53.8	10.76	12.4	0.769517
A. cruentus				4	159.172	0.137	63.9404	57.4493	-12.8018	58.8583	-12.5623	535.7	0.932933	0.0670665	0	0	126.283	na	31	50.8033	65.7	21.9	11.7	0.821918
A.tricolor	PI 277269	USDA-ARS	15	1	193.04	0.057	63.7542	57.2945	-15.3535	59.316	-15.0014	535.7	0.873475	0.0966086	0.0284084	0.00150839	82.292	6.072	21.4	73.796	59.55	11.91	9.9	0.833753
A.tricolor				2	157.38	0.063	63.7759	57.2398	-12.505	58.5898	-12.3236	534.45	0.755723	0.187213	0.0490107	0.00805316	42.79	4.06	17.2	35.292	15.9	3.18	2.9	0.81761
A.tricolor				3	165.711	0.064	63.2081	56.0616	-11.9488	57.3208	-12.0318	535.7	0.789846	0.180504	0.0277651	0.00188475	54.042	4.086	14.6	42.96	15.8	3.16	3.2	0.797468
A.tricolor				4	175.706	0.142	64.1817	58.8571	-16.3914	61.0969	-15.5622	535.7	0.832481	0.127877	0.0396419	0	99.43	na	39.6667	83.5333	92.1	30.7	12.5	0.864278
A.tricolor	PI 419057	USDA-ARS	16	1	153.843	0.062	65.5531	61.0687	-23.3116	65.3668	-20.8932	535.85	0.892665	0.0800195	0.0273157	0	98.376	7.15	32.6	83.2	73.49	14.698	13.8	0.812219
A.tricolor				2	196.657	0.09	64.5618	57.5914	-13.9646	59.2603	-13.6299	535.7	0.797373	0.153847	0.0433002	0.00548046	70.604	6.278	41.8	54.244	66.5	13.3	13.8	0.792481
A.tricolor				3	67.7634	0.082	63.5745	58.6165	-15.3559	60.5946	-14.68	535.7	0.766694	0.157919	0.065036	0.0103512	76.72	6.07	36.3333	60.4033	31	10.3333	8.1	0.73871
A.tricolor				4	208.609	0.032	65.7832	61.3704	-23.5537	65.7351	-20.9966	535.7	0.894341	0.0810715	0.0242976	0.000289456	102.957	na	53.15	79.02	94	31.3333	14.6	0.844681
A.tricolor	PI 603897	USDA-ARS	17	1	120.739	0.039	63.7022	56.9661	-13.6708	58.5834	-13.4947	536.75	0.945015	0.0395904	0.0135445	0	136.172	6.672	27.6	51.82	85.61	17.122	12.1	0.858661
A.tricolor				2	130.791	0.038	64.8958	59.5177	-15.6036	61.5291	-14.6905	534.8	0.836953	0.0983943	0.0601238	0.00452918	96.914	5.812	20.4	41.712	47.3	9.46	8.8	0.813953
A.tricolor				3	143.78	0.029	63.1848	56.1107	-11.2321	57.2238	-11.3197	534.95	0.811739	0.119215	0.0646253	0.00442166	65.744	3.222	9.4	27.566	13.4	2.68	2.8	0.791045
A.tricolor				4	181.741	0.154	63.9725	57.9005	-15.0182	59.8165	-14.5409	535.4	0.927982	0.0482172	0.0238007	0	142.55	na	36.6667	60.6967	91	30.3333	12.7	0.86044
A. cruentus	Burgundy	Seeds of Change	18	1	159.54	0.09	63.5701	55.1901	-9.90834	56.0725	-10.1779	536	0.885802	0.0815626	0.00920748	0	118.796	7.762	36.4	61.542	109.93	21.986	17.2	0.843537
A. cruentus				2	100.92	0.141	64.4785	57.4076	-13.5601	58.9873	-13.2901	536	0.849631	0.14369	0.00166303	0	67.65	4.974	24.6	34.688	26	5.2	5.2	0.8
A. cruentus				3	106.257	0.068	64.0326	57.0134	-14.8661	58.9196	-14.6143	535.9	0.854826	0.126098	0	0	57.51	4.336	19.6	29.768	19.9	3.98	3.5	0.824121
A. cruentus				4	209.928	0.157	64.5925	58.825	-19.005	61.8189	-17.9045	535.9	0.909611	0.0700918	0	0	137.483	na	47.3333	63.3733	96.8	32.2667	17.2	0.822314
A. quitensis	PI 490710	USDA-ARS	19	1	129.35	0.12	64.2502	58.2977	-22.0865	62.3413	-20.7495	535.7	0.952413	0.0341701	0.0118603	0	92.26	6.254	21.2	53.396	69.27	13.854	11.5	0.833983
A. quitensis				2	102.948	0.065	64.1791	56.6926	-13.5107	58.2802	-13.4044	535.9	0.925102	0.0558992	0.0189991	0	33.87	3.202	9.7	20.75	8.1	1.62	1.6	0.802469
A. quitensis				3	141.839	0.113	64.2731	58.9075	-24.2971	63.7216	-22.4143	538.2	0.873761	0.105266	0.0189463	0	59.9	6.02	19.75	34.505	32.2	8.05	6.4	0.801242
A. quitensis				4	200.597	0.218	64.8022	60.2098	-22.0916	64.1347	-20.1486	538.7	0.945897	0.0466133	0.00748966	0	87.9867	na	36	51.6833	99.6	33.2	16.9	0.830321
A. cruentus	Red Spike	Johnny's Seeds	20	1	179.415	0.063	63.3558	55.434	-13.3954	57.0295	-13.5849	536	0.90395	0.0697884	0.00653919	0	132.838	6.828	30	65.664	110.83	22.166	14.5	0.869169
A. cruentus				2	107.629	0.111	65.3381	59.4413	-16.6814	61.7376	-15.6761	535.9	0.815398	0.141253	0.00259533	0.0180561	76.55	4.756	25.6	34.866	30.1	6.02	4.5	0.850498
A. cruentus				3	69.1484	0.082	63.9365	56.0222	-12.5033	57.4005	-12.5813	535.85	0.817648	0.16077	0	0	79.122	5.198	26	34.806	40.7	8.14	8.1	0.800983
A. cruentus				4	211.176	0.064	64.3128	57.8383	-15.6513	59.9185	-15.1419	535.85	0.924753	0.0706493	0	0	138.953	na	38.6667	64.8567	91.4	30.4667	14	0.846827
A. cruentus	Burgundy Grain MU551	West Coast Seeds	21	1	178.608	0.058	63.488	56.2616	-12.986	57.7409	-12.9971	538.45	0.913032	0.0656193	0.00853838	0	107.645	6.8475	31.5	63.215	73.45	18.3625	14.5	0.802587
A. cruentus				2	88.3217	0.102	63.7204	55.1253	-7.99544	55.7021	-8.25269	535.75	0.837966	0.146012	0	0	96.43	6.502	35	48.598	76.6	15.32	14.5	0.810705
A. cruentus				3	80.6058	0.142	63.7678	55.5476	-10.3641	56.5062	-10.5687	535.9	0.805175	0.174266	0	0	91.056	6.576	31	46.436	60.7	12.14	12.3	0.797364
A. cruentus				4	207.519	0.045	64.5713	58.4489	-16.4556	60.7212	-15.724	535.9	0.938531	0.0614687	0	0	132	na	47	53.9567	91.1	30.3667	13.2	0.855104
A. cruentus	Garnet Red	Johnny's Seeds	22	1	182.053	0.061	64.0902	57.3584	-14.5189	59.1674	-14.2046	535.9	0.915256	0.0618352	0.00960458	0.00175512	113.722	7.375	33.5	63.558	97.09	19.418	14.2	0.853744
A. cruentus				2	93.6246	0.188	64.2655	56.4318	-10.837	57.4629	-10.8706	535.9	0.807439	0.166327	0	0	92.082	5.436	34.2	44.154	36.8	12.48	8.2	0.777174
A. cruentus				3	113.791	0.114	64.4123	57.7774	-16.8441	60.1827	-16.2532	537	0.833976	0.144187	0.00146398	0	85.1	5.762	30.4	43.558	45.6	9.12	9.3	0.796053
A. cruentus				4	164.811	0.067	64.4556	57.7053	-15.8186	59.8342	-15.3298	533.25	0.919506	0.0712109	0	0	132.727	na	48.3333	62.4333	104.9	34.9667	15.1	0.856053
A. tricolor	PI 667171	USDA-ARS	23	1	154.358	0.049	62.8644	55.0917	-11.8304	56.3476	-12.1196	535.7	0.89212	0.0889783	0.0189012	0	93.566	6.038	21	71.786	55.02	11.004	9.2	0.832788
A. tricolor				2	99.2804	0.054	63.5024	55.3049	-6.58854	55.6959	-6.7937	534.45	0.813119	0.141961	0.0352685	0.00965082	63.564	5.538	16.8	53.646	28.5	5.7	5.5	0.807018
A. tricolor				3	103.911	0.067	61.9148	52.5395	-2.72868	52.6103	-2.97303	533.2	0.754054	0.198002	0.0417456	0.00619796	62.158	4.892	12.6	43.298	18.4	3.68	4	0.782609
A. tricolor				4	149.024	0.02	62.8804	55.2405	-10.7241	56.2718	-10.9864	533.2	0.924165	0.0630604	0.0127742	0	115.137	na	36.3333	83.9567	93.2	31.0667	15.1	0.837983
A. tricolor	Ames 2214	USDA-ARS	24	1	110.608	0.041	62.754	54.6111	-8.84826	55.3233	-9.20326	533.8	0.893789	0.0658685	0.0372439	0.00309841	99.744	5.746	25.6	56.152	73.46	14.692	9.8	0.866594
A. tricolor				2	85.9601	0.094	61.8069	54.2416	-7.61689	54.7738	-7.9935	532.95	0.851555	0.0879412	0.0552266	0	72.11	4.982	20	40.312	49.8	9.96	9.2	0.815261
A. tricolor				3	114.248	0.039	62.4611	54.2637	-7.09281	54.7253	-7.44691	533.9	0.763002	0.136369	0.100629	0	85.7167	4.83	19.6667	46.21	26.6	8.86667	4.9	0.815789
A. tricolor				4	187.291	0.029	63.0994	56.1541	-14.4062	57.9726	-14.3888	533.9	0.875389	0.0634469	0.061164	0	119.923	na	38	58.3267	100.6	33.5333	13.1	0.869781
A. cruentus	PI 647848	USDA-ARS	25	1	84.6561	0.058	63.4458	53.2684	-3.54916	53.3865	-3.81185	537	0.845267	0.0626403	0.070463	0.00682583	113.412	7.97	36.75	70.5125	97.62	24.405	11.6	0.881172
A. cruentus				2	69.2311	0.168	63.9668	54.9822	-7.36523	55.4734	-7.62972	536.5	0.818879	0.154492	0.00387272	0	72.294	5.714	27	36.26	49.2	9.84	11.6	0.764228
A. cruentus				3	84.3612	0.207	64.4234	56.7902	-12.6224	58.1761	-12.5311	536	0.812319	0.186271	0.00140989	0	85.486	5.872	29.6	43.02	54.7	10.94	11.9	0.78245
A. cruentus				4	241.933	0.164	65.6874	61.9352	-19.21	64.8459	-17.2319	535.7	0.933591	0.0664086	0	0	122.503	na	37.6667	54.46	66.5	22.1667	10.5	0.842105
A. tricolor	Ames 25153	USDA-ARS	26	1	196.657	0.037	64.5306	59.448	-20.2063	62.7882	-18.7728	535.7	0.869388	0.112194	0.0170854	0.00133288	101.8	5.9	24	46.518	66.36	13.272	13.24	0.800482
A. tricolor				2	41.24	0.06	61.6542	55.24	-11.36	56.396	-11.6208	533.05	0.828857	0.13126	0.0398833	0	64.328	4.176	16	31.38	24.5	4.9	5	0.795918
A. tricolor				3	59.155	0.038	62.0848	52.6066	-2.8839	52.6856	-3.13782	534.65	0.751874	0.183002	0.0597201	0.00540404	58.724	3.582	12	26.35	16.3	3.26	3.6	0.779141
A. tricolor				4	171.487	0.079	63.9513	57.8076	-14.7534	59.6605	-14.3171	534.65	0.884728	0.0934458	0.0218267	0	114.963	na	35.6667	39.3	81.9	27.3	11.2	0.863248
A. tricolor	PI 608761	USDA-ARS	27	1	126.209	0.037	62.9565	55.1565	-12.1385	56.4764	-12.4114	535.4	0.912625	0.0649489	0.0224264	0	89.72	6.652	20.4	73.682	65.72	13.144	11.14	0.830493
A. tricolor				2	88.0049	0.034	62.5103	53.8857	-8.23473	54.5113	-8.68863	534.7	0.803242	0.142239	0.0487262	0.00579298	68.334	5.542	17	50.1	34.4	6.88	7.7	0.776163
A. tricolor				3	92.4297	0.07	60.4554	53.12	-3.47	53.2332	-3.73747	533.25	0.774376	0.168064	0.0535373	0.00402312	65.938	4.572	11.8	48.54	18.2	3.64	4.4	0.758242
A. tricolor				4	150.673	0.066	62.7187	54.2472	-4.96097	54.4735	-5.22524	536	0.906756	0.0743647	0.0188796	0	111.913	na	36.6667	72.5967	81.2	27.0667	11.5	0.858374
A. tricolor	PI 603898	USDA-ARS	28	1	154.173	0.046	63.2249	56.0502	-14.1673	57.813	-14.185	534.3	0.852463	0.101848	0.043381	0.00230838	104.468	6.012	23	61.418	83.22	16.644	11.54	0.861331
A. tricolor				2	79.95	0.021	62.6115	53.984	-4.01666	54.1332	-4.25523	533.05	0.879147	0.120853	0	0	82.828	4.946	17.2	48.034	44.4	8.88	7.7	0.826577
A. tricolor				3	94.4507	0.029	61.2697	51.2102	0.027384	51.2102	0.0306382	533.4	0.843735	0.0990801	0.0543825	0.00280236	60.5075	3.31	9.75	32.3	12.1	3.025	2.4	0.801653
A. tricolor				4	121.541	0.273	62.9647	55.4686	-11.9803	56.7476	-12.1878	533.4	0.870861	0.085253	0.0438862	0	117.697	na	29.6667	61.97	85.61	28.5367	13.2	0.845812
A. blitum	PI 606282	USDA-ARS	29	1	158.378	0.061	64.6011	58.6657	-17.5262	61.2277	-16.6333	535.7	0.90588	0.0768389	0.00481666	0.00496545	104.814	10.97	40.6	67.372	124.77	24.954	18.5	0.851727
A. blitum				2	44.3662	0.098	59.0794	55.7166	5.37132	55.9749	5.50654	534.5	0.828213	0.163048	0.00873885	0	65.79	7.3275	31.5	40.635	37.6	0	7.6	0.797872
A. blitum				3	56.1775	0.088	59.2379	53.2396	3.37751	53.3466	3.62997	536.85	0.786555	0.213445	0	0	57.806	5.96	20.8	37.226	32.7	6.54	7.6	0.767584
A. blitum				4	184.641	0.045	65.2428	61.2182	-22.2908	65.1502	-20.0076	538.85	0.91821	0.0817897	0	0	94.2667	na	53.3333	58.8933	141.3	47.1	18.9	0.866242
A. cruentus	Black Leaved	Seed Savers Exchange	30	2	96.2809	0.124	65.2193	58.5393	-13.7421	60.1307	-13.211	536.75	0.845301	0.143866	0	0	68.722	5.596	28.8	33.012	41.5	8.3	8.7	0.790361
A. cruentus				3	76.5713	0.142	64.1066	56.5771	-13.8148	58.2393	-13.7218	535.9	0.849063	0.138594	0	0	78.4767	5.40333	28.6667	34.9067	20.9	6.96667	4.2	0.799043
A. cruentus				4	133.019	0.059	64.0981	56.6656	-13.8554	58.3349	-13.7399	535.9	0.918001	0.0819989	0	0	129.657	na	46.3333	59.4633	97.1	32.3667	14.1	0.854789
A. tricolor	Molten Fire	Livingston Seed	31	2	68.42	na	63.6464	55.8237	-4.87549	56.0362	-4.99139	533.9	0.782348	0.0996254	0.0949389	0.00973724	68.756	4.264	17.6	39.128	57	10.5	10.6	0.814035
A. tricolor				3	67.9017	na	62.1119	52.314	1.5221	52.3362	1.66658	533.05	0.799517	0.119008	0.0523821	0.0208215	91.6825	5.8975	23	56.8625	57	14.25	10.5	0.815789
A. tricolor				4	159.826	na	64.8439	60.5745	-14.5	62.2858	-13.4619	535	0.913003	0.0584646	0.0285327	0	142.947	na	42.3333	47.5767	125.8	41.9333	27.2	0.783784
A. tricolor	PI 674261	USDA-ARS	32	1	123.669	0.07	62.6901	54.7627	-12.5249	56.1767	-12.8827	536	0.897174	0.0833086	0.0179723	0.00154505	100.022	6.424	21.2	77.674	63.06	12.612	10.5	0.833492
A. tricolor				2	67.9994	0.281	62.7284	53.031	-1.57867	53.0545	-1.70513	534.45	0.835241	0.129992	0.034767	0	77.846	6.252	18.6	60.372	46.8	9.36	7.7	0.83547
A. tricolor				3	68.5041	0.075	61.2592	50.3509	4.3362	50.5373	4.92215	533.9	0.783169	0.188259	0.0285717	0	70.796	5.802	14	48.96	33.4	6.68	7.7	0.769461
A. tricolor				4	100.509	0.017	62.2009	52.8432	-5.41313	53.1197	-5.84884	533.9	0.92029	0.0624419	0.0172686	0	114.343	na	43.6667	85.8067	118.9	39.6333	18.7	0.842725
A. tricolor	PI 419121	USDA-ARS	33	1	169.663	0.074	64.856	59.5966	-20.1998	62.9268	-18.7237	537	0.818878	0.175615	0.00550719	0	85.198	6.69	20.8	74.95	64.86	12.972	11.14	0.828245
A. tricolor				2	51.15	0.034	61.2134	49.6687	12.438	51.2024	14.0589	532.65	0.757022	0.225037	0.0179415	0	66.304	6.766	16.4	52.212	35.4	7.08	8.3	0.765537
A. tricolor				3	59.9766	0.071	61.1689	49.1673	13.2385	50.9184	15.0697	538.6	0.735663	0.213692	0.0407795	0.00986583	67.62		18.2	54.754	35	7	8.3	0.762857
A. tricolor				4	49.8029	0.027	61.7792	51.1922	5.39745	51.476	6.01874	537	0.909727	0.0902729	0	0	110.627	na	44.3333	85.35	120.6	40.2	16.2	0.865672
A. graecizans	PI 608661	USDA-ARS	34	1	106.799	0.075	63.3166	56.2149	-13.3365	57.7753	-13.3462	534.95	0.948758	0.0432371	0.00800495	0	78.126	4.304	26.2	44.394	56.5	11.3	9.2	0.837168
A. graecizans				2	38.6397	0.058	60.424	50.39	6.21	50.7712	7.02563	534.15	0.831475	0.168525	0	0	50.17	3.628	41.6	29.818	34	6.8	8.8	0.741176
A. graecizans				3	54.3335	0.071	61.3139	51.2091	-0.38	51.2105	-0.425159	533.9	0.800219	0.191486	0.00829518	0	60.632	3.54	29.8	33.468	30.4	6.08	7.1	0.766447
A. graecizans				4	94.1449	0.058	63.97	57.752	-15.8	59.8743	-15.3008	533.9	0.95643	0.0330104	0.0105595	0	86.96	na	64.6667	48.6867	107.5	35.8333	13.5	0.874419
A. tricolor	Red Leaf	West Coast Seeds	35	1	84.6901	0.046	na	na	na	na	na	na	0.786244	0.202362	0.0101718	0.00122216	114.662	7.048	21.2	93.602	79.34	15.868	13.53	0.829468
A. tricolor				2	32.4012	0.049	na	na	na	na	na	na	0.751564	0.248436	0	0	60.438	6.248	16.4	53.744	36.7	7.34	7.6	0.792916
A. tricolor				3	44.9028	0.08	na	na	na	na	na	na	0.73384	0.253416	0.0127448	0	71.975	6.9425	17.75	58.19	37.5	9.375	7.8	0.792
A. tricolor				4	106.563	0.272	na	na	na	na	na	na	0.799304	0.186676	0.0140199	0	108.437	na	29.3333	94.6967	82.9	27.6333	12.3	0.851628
A. tricolor	Ames 2132	USDA-ARS	36	1	47.5614	0.065	na	na	na	na	na	na	0.900283	0.0813701	0.0183465	0	102.878	8.298	36.2	80.256	82.94	16.588	14	0.831203
A. tricolor				2	47.03	0.595	na	na	na	na	na	na	0.87138	0.103698	0.0249215	0	70.716	6.602	37.8	48.548	62.8	12.56	11.3	0.820064
A. tricolor				3	47.1782	0.081	na	na	na	na	na	na	0.832259	0.153506	0.014235	0	84.95	7.12	26	58.198	51.9	10.38	11.3	0.782274
A. tricolor				4	86.3497	0.028	na	na	na	na	na	na	0.956711	0.0432885	0	0	108.333	na	61.6667	66.7033	125.4	41.8	18.1	0.855662
A. tricolor	PI 477918	USDA-ARS	37	2	26.88	0.036	na	na	na	na	na	na	0.729192	0.259469	0.0113384	0	70.61	6.936	16.4	63.766	41.4	8.28	10.2	0.753623
A. tricolor				3	34.4985	0.073	na	na	na	na	na	na	0.712156	0.277314	0.0105305	0	83.412	7.466	17.4	69.9	47.8	9.56	10.2	0.786611
A. tricolor				4	90.0535	0.273	na	na	na	na	na	na	0.868364	0.119303	0.0123337	0	105.55	na	30.8333	92.6967	80.3	26.7667	11.7	0.854296
A. quitensis	PI 490712	USDA-ARS	38	1	38.075	0.1	na	na	na	na	na	na	0.911769	0.0579041	0.0204095	0.00376048	95.7875	6.26	25.25	54.8925	52.66	13.165	7.95	0.849032
A. quitensis				2	22.999	0.083	na	na	na	na	na	na	0.886342	0.095584	0.0180744	0	43.032	3.548	15.4	21.138	12.8	2.56	2.4	0.8125
A. quitensis				3	28.6985	0.091	na	na	na	na	na	na	0.87449	0.113287	0.0122229	0	56.078	4.362	18.4	27.058	22.3	4.46	4.2	0.811659
A. quitensis				4	96.6737	0.118	na	na	na	na	na	na	0.960838	0.0391621	0	0	100.94	na	33.6667	48.5733	76.6	25.5333	11.7	0.847258
A. cruentus	PI 451711	USDA-ARS	39	1	67.2853	0.074	na	na	na	na	na	na	0.91515	0.0514886	0.0116333	0	121.395	6.615	25	65.73	33.32	16.66	5.7	0.828932
A. cruentus				2	38.4097	0.119	na	na	na	na	na	na	0.848429	0.116937	0	0	102.61	6.38667	29.3333	53.1267	37.6	12.5333	8.6	0.771277
A. cruentus				3	39.4367	0.137	na	na	na	na	na	na	0.824084	0.159572	0	0	118.19	6.39	31	60.43	18.2	9.2	4.1	0.774725
A. cruentus				4	41.198	0.087	na	na	na	na	na	na	1	0	0	0	136.113	na	41	63.0933	99.1	33.0333	19.3	0.805247
A. tricolor	Ames 2223	USDA-ARS	40	2	25.8734	0.071	na	na	na	na	na	na	0.847814	0.136381	0.0158043	0	62.422	6.396	21.2	41.836	40.4	8.08	8.3	0.794554
A. tricolor				3	21.5868	0.058	na	na	na	na	na	na	0.921004	0.0663132	0.012683	0	63.098	6.082	23	39.814	42.6	8.52	8.8	0.793427
A. tricolor				4	56.3101	0.213	na	na	na	na	na	na	0.907841	0.0718199	0.0203394	0	116.047	na	46.6667	73.6167	110.3	36.7667	20.4	0.81505
A. dubius	PI 605352	USDA-ARS	41	2	13.22	0.107	na	na	na	na	na	na	1	0	0	0	61.95	4.278	24.5	39.832	22	4.4	5.4	0.754545
A. dubius				3	11.7733	0.143	na	na	na	na	na	na	1	0	0	0	65.112	5.398	26.8	44.4	30.3	6.06	7	0.768977
A. dubius				4	66.6264	0.094	na	na	na	na	na	na	0.969355	0.0306451	0	0	102.6	na	31	71.03	25.1	25.1	3.6	0.856574
A. cruentus	Big Red	Seed Savers Exchange	42	2	16.06	0.079	na	na	na	na	na	na	0.93233	0.0380991	0	0	89.915	6.955	28	51.305	26.9	13.45	6.3	0.765799
A. cruentus				3	21.442	0.159	na	na	na	na	na	na	0.904506	0.0816005	0	0	93.638	6.83	34.8	51.188	60.5	12.1	15.5	0.743802
A. cruentus				4	21.7467	0.089	na	na	na	na	na	na	0.950135	0.0498649	0	0	121.31	na	41.5	57.35	61.6	30.8	13.2	0.785714
A. tricolor	Aurora Yellow	Baker Creek Seeds	43	2	8.65085	0.051	na	na	na	na	na	na	0.913773	0	0.0862275	0	61.742	4.55	11.8	28.582	32.2	6.44	6.5	0.798137
A. tricolor				3	8.21392	na	na	na	na	na	na	na	1	0	0	0	53.78	4.6325	8.5	24.445	18.1	4.525	3.5	0.80663
A. tricolor				4	28.6794	0.02	na	na	na	na	na	na	1	0	0	0	129.35	na	29.3333	47.96	127.7	42.5667	16.9	0.867659
A. cruentus	Ames 2234	USDA-ARS	44	1	9.84342	0.042	na	na	na	na	na	na	1	0	0	0	124.672	6.494	31.6	57.972	91.84	18.368	14.76	0.839286
A. cruentus				2	7.39437	0.075	na	na	na	na	na	na	1	0	0	0	95.318	5.546	17.4	33.97	46	9.2	8.9	0.806522
A. cruentus				3	11.9991	0.09	na	na	na	na	na	na	0.874251	0.125749	0	0	92.848	5.294	17	39.488	34.9	6.98	7.7	0.77937
A. cruentus				4	23.9978	0.049	na	na	na	na	na	na	1	0	0	0	155.367	na	41.3333	60.5067	99.3	33.1	15.8	0.840886
A. cruentus	Dreadlocks	Wild Garden Seed	45	1	7.59977	0.115	na	na	na	na	na	na	1	0	0	0	111.808	6.528	21.8	61.124	72.31	14.462	11.9	0.835431
A. cruentus				2	9.04119	0.142	na	na	na	na	na	na	1	0	0	0	78.6775	5.545	27.75	38.11	36.1	9.025	7.5	0.792244
A. cruentus				3	11.5318	0.166	na	na	na	na	na	na	1	0	0	0	68.636	4.976	22.4	33.514	35.1	7.02	7.8	0.777778
A. cruentus				4	22.9418	0.083	na	na	na	na	na	na	1	0	0	0	108.37	na	36.3333	53.1567	69.7	23.2333	13.4	0.807747
A. caudatus	PI 553073	USDA-ARS	46	1	6.79994	0.123	na	na	na	na	na	na	1	0	0	0	125.492	6.988	26.4	60.2	86.06	17.212	13.3	0.845457
A. caudatus				2	14.6	0.057	na	na	na	na	na	na	0.974142	0.0258583	0	0	43.116	2.564	11.8	19.324	12.5	10.7	2.6	0.792
A. caudatus				3	8.60955	0.138	na	na	na	na	na	na	1	0	0	0	101.708	6.26	27.8	49.236	64.4	12.88	11	0.829193
A. caudatus				4	14.3459	0.07	na	na	na	na	na	na	1	0	0	0	104.433	na	35.6667	44.6067	71.6	23.8667	10.4	0.854749
A. cruentus	Hot Biscuits	Wild Garden Seed	47	1	6.17433	0.063	na	na	na	na	na	na	1	0	0	0	112.476	6.536	31	63.426	84.64	16.928	13.56	0.839792
A. cruentus				2	5.54	0.223	na	na	na	na	na	na	1	0	0	0	68.584	4.98	26	31.31	28.7	5.74	6.6	0.770035
A. cruentus				3	5.36183	0.068	na	na	na	na	na	na	1	0	0	0	92.754	6.33	32.4	46.032	59.4	11.88	13.4	0.774411
A. cruentus				4	8.40725	0.117	na	na	na	na	na	na	1	0	0	0	137.037	na	46	69.6867	111.4	37.1333	21.4	0.807899
A. hypochondriacus	PI 558499	USDA-ARS	48	1	2.67126	0.18	na	na	na	na	na	na	0.910785	0.0595104	0.0297048	0	105.775	6.395	34	57.935	66.8	16.7	12.69	0.81003
A. hypochondriacus				2	3.49458	0.288	na	na	na	na	na	na	1	0	0	0	74.422	6.336	33.8	39.49	64	12.8	13.3	0.792188
A. hypochondriacus				3	4.51878	0.39	na	na	na	na	na	na	1	0	0	0	65.64	5.2525	22.5	35.3	28.8	7.2	6.2	0.784722
A. hypochondriacus				4	8.19543	0.339	na	na	na	na	na	na	0.938052	0.0424562	0	0	119.257	na	36.3333	61.42	115.2	38.4	16.4	0.857639
